# Supplementary material for: Persistent Scatterer Interferometry (PSI) Technique for the Identification and Monitoring of Critical Landslide Areas in a Regional and Mountainous Road Network
Source: MDPI journal article supplement (doi:10.3390/rs15061550), 2023-03-12
Supplement: s1 [file s1]

**Supplementary Material for**  
**“Persistent Scatterer Interferometry (PSI) Technique for the Identification and Monitoring of Critical Landslide areas in a Regional and Mountainous Road Network”**

**The pdf Supplementary Material for the manuscript includes:**

Figures S1-S4

Tables S1-S4

## FIGURES

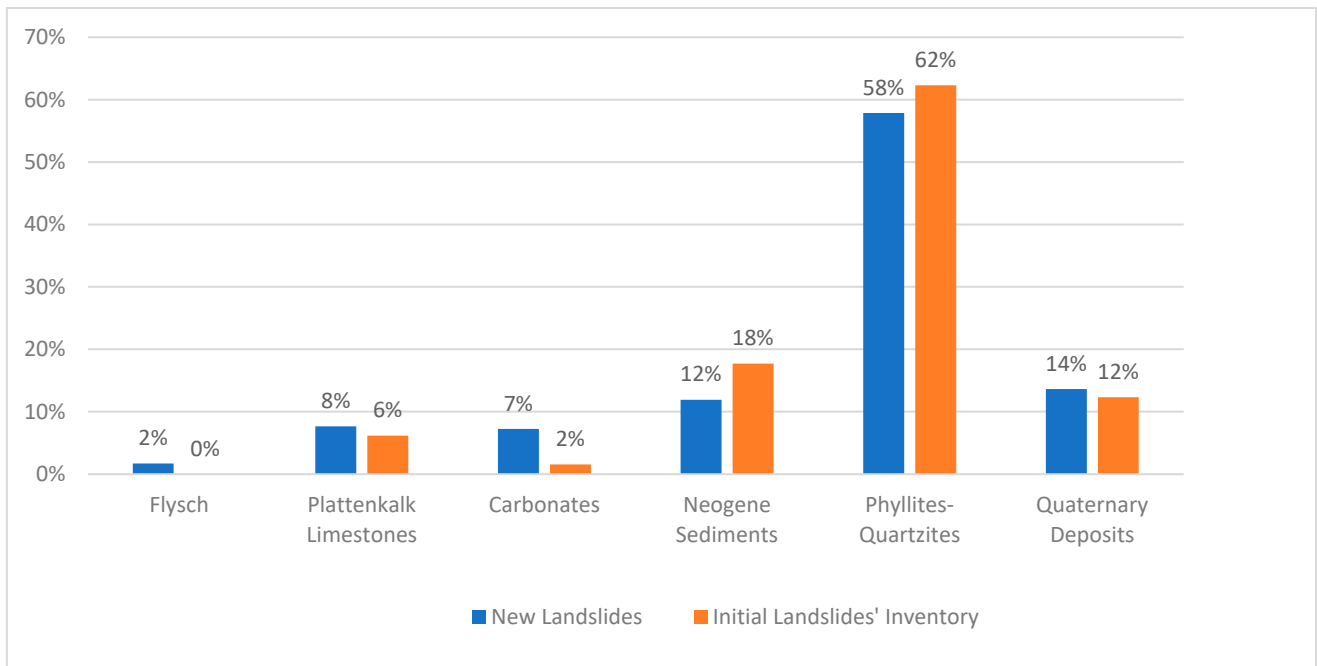

**Figure S1.** New Landslides and Initial Landslides' Inventory according to the Outcropping Geology.

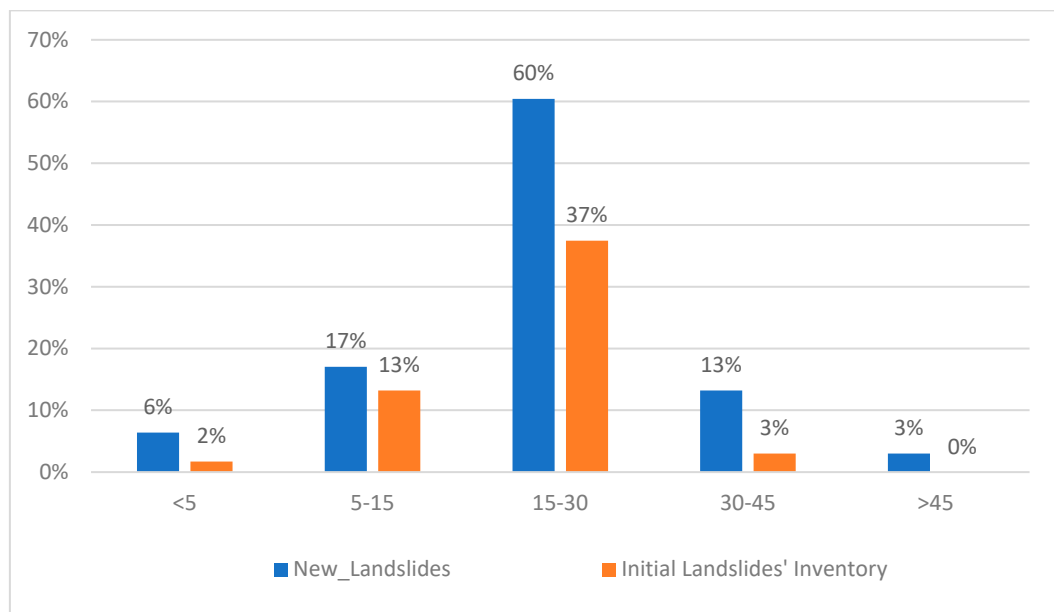

**Figure S2.** New Landslides and Initial Landslides' Inventory according to the Slope's Angle.

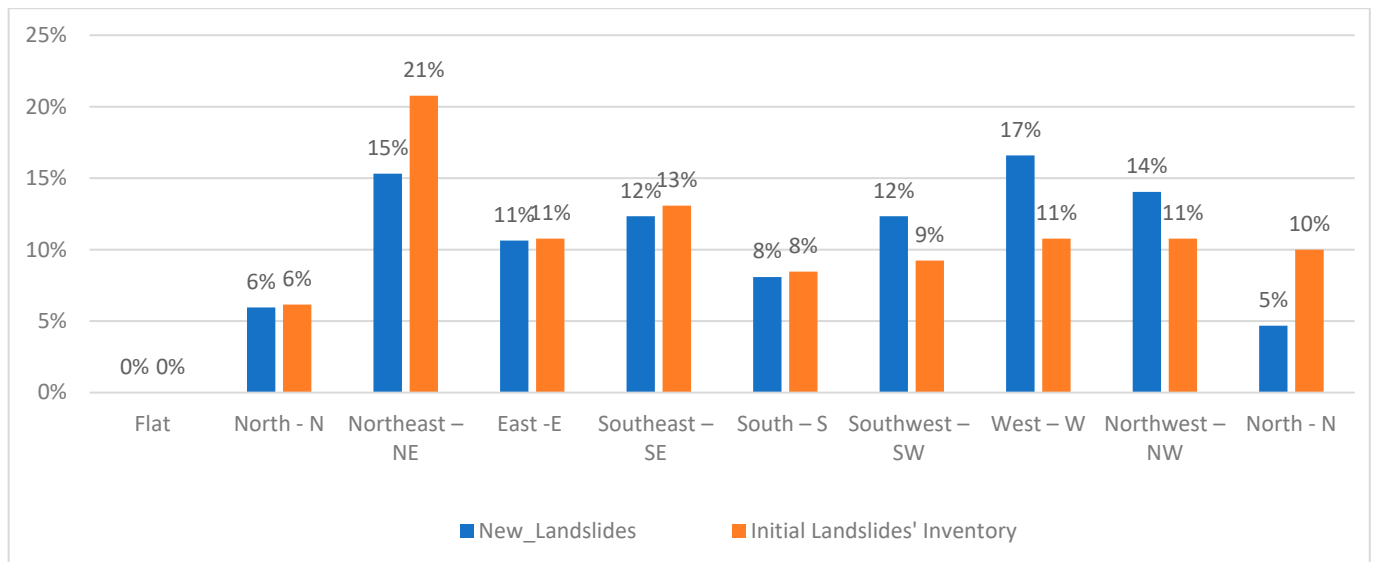

**Figure S3.** New Landslides and Initial Landslides' Inventory according to the Slope's Aspect.

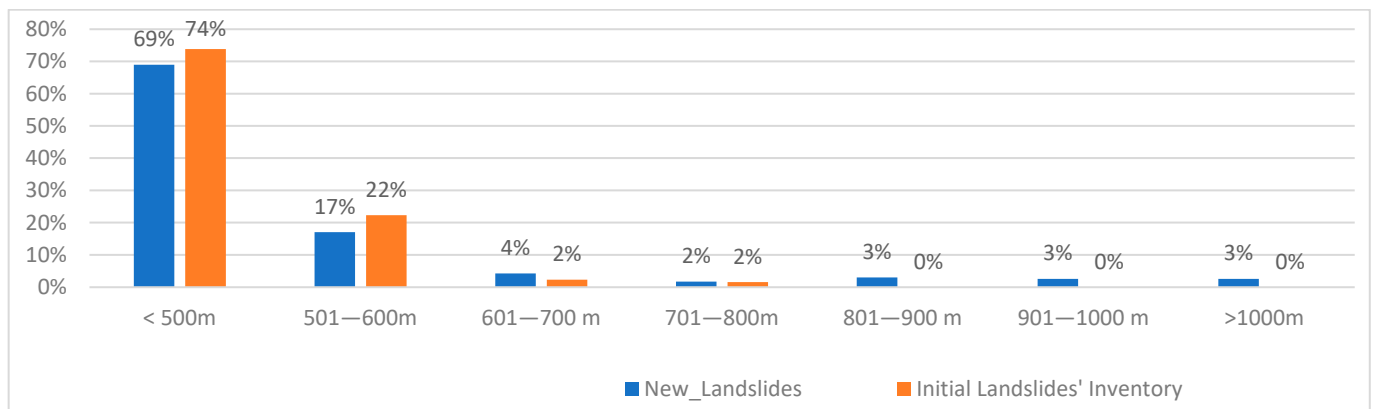

**Figure S4.** New Landslides and Initial Landslides' Inventory according to the Relative Relief.

## **TABLES**

**Table S1.** New Landslides and Initial Landslides' Inventory according to the Outcropping Geology.

| ID | GCode          | Outcropping Geological Formation | Number of      |                               | Percentage of  |                               |
|----|----------------|----------------------------------|----------------|-------------------------------|----------------|-------------------------------|
|    |                |                                  | New Landslides | Initial Landslides' Inventory | New Landslides | Initial Landslides' Inventory |
| 1  | fo, ft         | Flysch                           | 4              | 0                             | 2%             | 0%                            |
| 2  | J-E            | Plattenkalk Limestones           | 18             | 8                             | 8%             | 6%                            |
| 3  | K-E, K.k, T.br | Carbonates                       | 17             | 2                             | 7%             | 2%                            |
| 4  | Mk , Mm.l      | Neogene Sediments                | 28             | 23                            | 12%            | 18%                           |
| 5  | Ph-T           | Phyllites- Quartzites            | 136            | 81                            | 58%            | 62%                           |
| 6  | Q.al           | Quaternary Deposits              | 32             | 16                            | 14%            | 12%                           |

**Table S2.** New Landslides and Initial Landslides' Inventory according to the Slope's Angle.

| ID | Slope's Angle | Number of      |                               | Percentage of  |                               |
|----|---------------|----------------|-------------------------------|----------------|-------------------------------|
|    |               | New Landslides | Initial Landslides' Inventory | New Landslides | Initial Landslides' Inventory |
| 1  | <5°           | 15             | 4                             | 6%             | 3%                            |
| 2  | 5°-15°        | 40             | 31                            | 17%            | 23%                           |
| 3  | 15°-30°       | 142            | 88                            | 60%            | 69%                           |
| 4  | 30°-45°       | 31             | 7                             | 13%            | 5%                            |
| 5  | >45°          | 7              | 0                             | 3%             | 0%                            |

**Table S3.** New Landslides and Initial Landslides' Inventory according to the Slope's Aspect.

| ID | Slope's Aspect                   | Number of      |                               | Percentage of  |                               |
|----|----------------------------------|----------------|-------------------------------|----------------|-------------------------------|
|    |                                  | New Landslides | Initial Landslides' Inventory | New Landslides | Initial Landslides' Inventory |
| 1  | North - N (0° – 22.5°)           | 0              | 0                             | 0%             | 0%                            |
| 2  | Northeast – NE (22.5° – 67.5°)   | 14             | 8                             | 6%             | 6%                            |
| 3  | East -E (67.5° – 112.5°)         | 36             | 27                            | 15%            | 21%                           |
| 4  | Southeast – SE (112.5° – 157.5°) | 25             | 14                            | 11%            | 11%                           |
| 5  | South – S (157.5° – 202.5°)      | 29             | 17                            | 12%            | 13%                           |
| 6  | Southwest – SW (202.5° – 247.5°) | 19             | 11                            | 8%             | 8%                            |
| 7  | West – W (247.5° – 292.5°)       | 29             | 12                            | 12%            | 9%                            |
| 8  | Northwest – NW (292.5° – 337.5°) | 39             | 14                            | 17%            | 11%                           |
| 9  | North - N (337.5° – 360°)        | 33             | 14                            | 14%            | 11%                           |
| 10 | North - N (337.5 – 360)          | 11             | 13                            | 5%             | 10%                           |

**Table S4.** New Landslides and Initial Landslides' Inventory according to the Relative Relief.

| ID | Relative Relief (m) | Number of      |                               | Percentage of  |                               |
|----|---------------------|----------------|-------------------------------|----------------|-------------------------------|
|    |                     | New Landslides | Initial Landslides' Inventory | New Landslides | Initial Landslides' Inventory |
| 1  | < 500m              | 162            | 96                            | 69%            | 74%                           |
| 2  | 501 – 600m          | 40             | 29                            | 17%            | 22%                           |
| 3  | 601 – 700 m         | 10             | 3                             | 4%             | 2%                            |
| 4  | 701 – 800m          | 4              | 2                             | 2%             | 2%                            |
| 5  | 801 – 900 m         | 7              | 0                             | 3%             | 0%                            |
| 6  | 901 – 1000 m        | 6              | 0                             | 3%             | 0%                            |
| 7  | >1000m              | 6              | 0                             | 3%             | 0%                            |
