# Supplementary material for: Persistent Scatterer Interferometry (PSI) Technique for the Identification and Monitoring of Critical Landslide Areas in a Regional and Mountainous Road Network
Source: MDPI journal article supplement (doi:10.3390/rs15061550), 2023-03-12
Supplement: s1 [file s1]

Archive with 5 entries (5 files):
- S1.png
- S2.png
- S3.png
- S4.png
- Supplementary Material_PS_Chania_2023.pdf
