# Supplementary figures and images for: Persistent Scatterer Interferometry (PSI) Technique for the Identification and Monitoring of Critical Landslide Areas in a Regional and Mountainous Road Network
Source: MDPI journal article supplement (doi:10.3390/rs15061550), 2023-03-12

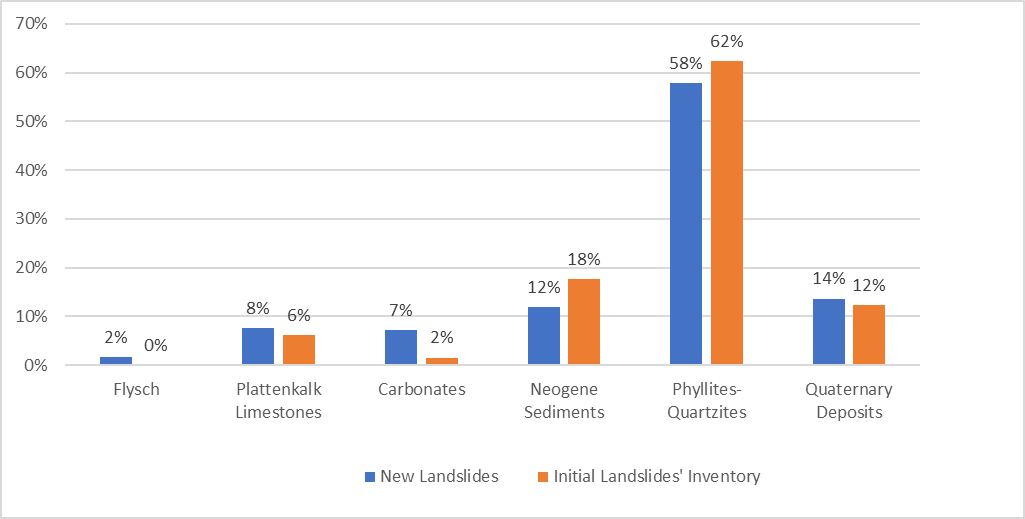

Supplement: s1 [file s1 › S1.png]

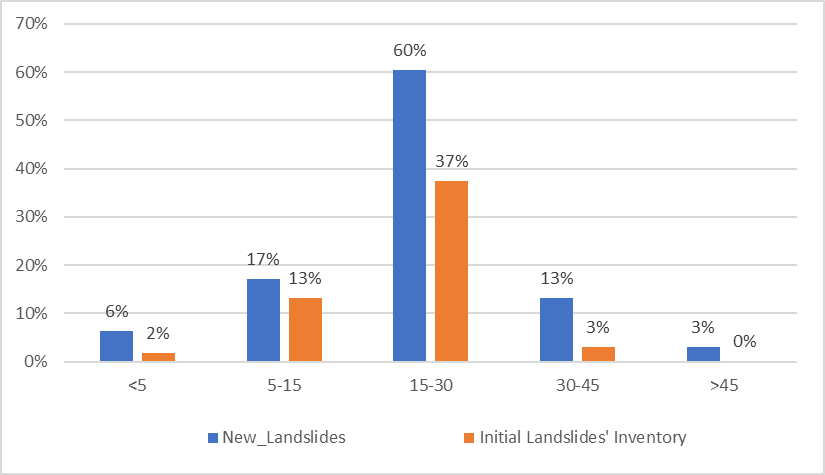

Supplement: s1 [file s1 › S2.png]

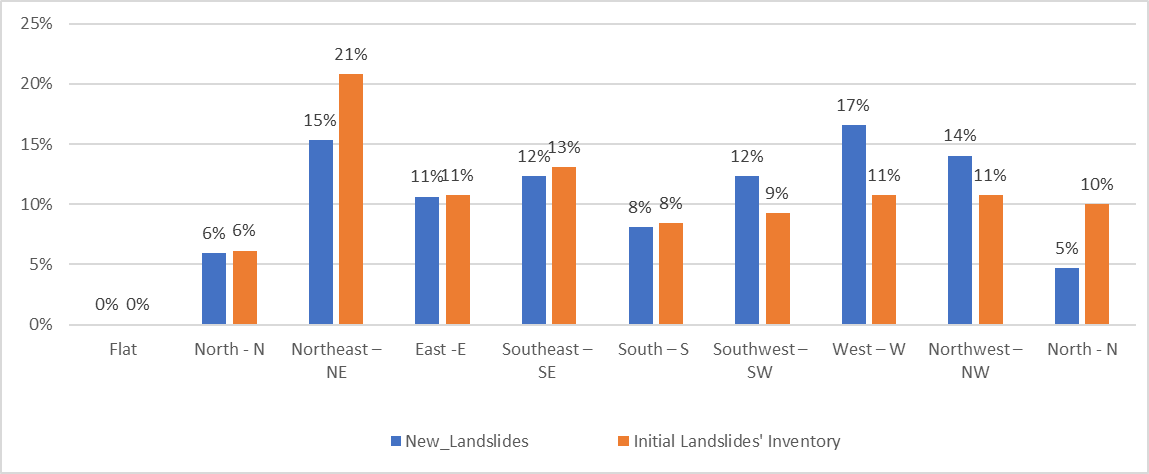

Supplement: s1 [file s1 › S3.png]

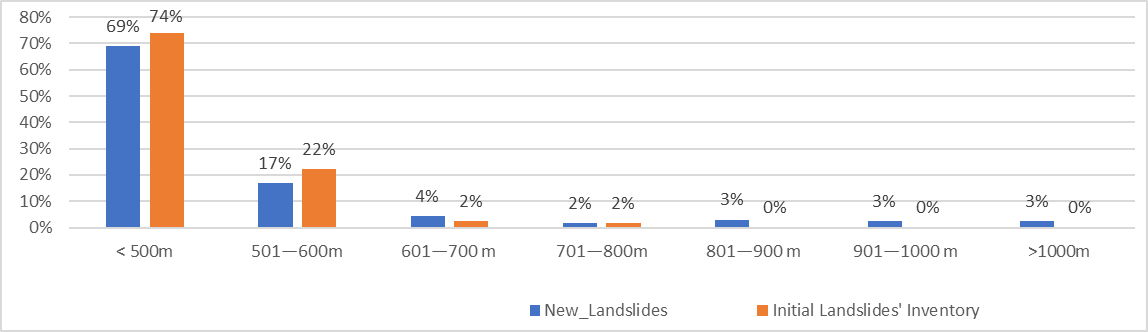

Supplement: s1 [file s1 › S4.png]
